# Supplementary material
Source: publisher figshare collection journal article supplement (https://karger.figshare.com/ndownloader/files/22067610)
Supplement: Supplementary file 1 [file 22067610]

# Online Supplement File 5:

# Association between the exposure (categorized using 20 and 50 mGy as cut-off points) and selected covariates using a multinomial logistic regression models.

| Supplementary table S5.1: OR and 95% CI for different category of cumulative dose by potential confounder variables (Only in Controls) | | | | | | | | |
| --- | --- | --- | --- | --- | --- | --- | --- | --- |
|  | **Variables** | **[20; 50) mGy** | **95% CI** | |  | **≥50 mGy** | **95% CI** | |
| **Sex** | Female | 1 |  |  |  | 1 |  |  |
|  | Male | 1.32 | 0.89 | 1.97 |  | **0.44** | **0.23** | **0.87** |
| Age category | <14 years | 1 |  |  |  | 1 |  |  |
|  | [14,18) years | **2.20** | **1.24** | **3.91** |  | **2.54** | **0.77** | **8.39** |
|  | ≥18 years | **2.72** | **1.57** | **4.70** |  | **5.97** | **2.01** | **17.78** |
| Country | Spain | 1 |  |  |  | 1 |  |  |
|  | Italy | 0.71 | 0.38 | 1.34 |  | 1.28 | 0.37 | 4.39 |
|  | Israel | 0.65 | 0.29 | 1.47 |  | 1.67 | 0.41 | 6.83 |
|  | France | 0.77 | 0.37 | 1.60 |  | 1.93 | 0.50 | 7.48 |
|  | Japan | 1.52 | 0.79 | 2.91 |  | 5.53 | 1.61 | 18.97 |
|  | Germany&Austria | 0.84 | 0.38 | 1.82 |  | 0.65 | 0.11 | 3.69 |
|  | AU,CA,IN,GR,NL,NZ,KR | 0.73 | 0.38 | 1.39 |  | 2.50 | 0.75 | 8.35 |
| SES | Low | 1 |  |  |  | 1 |  |  |
|  | Medium | 0.78 | 0.45 | 1.35 |  | 1.79 | 0.71 | 4.52 |
|  | High | 0.70 | 0.43 | 1.16 |  | 1.48 | 0.63 | 3.45 |
|  | other/don't know | 0.99 | 0.52 | 1.87 |  | 0.83 | 0.21 | 3.30 |
| Neurological disease | None | 1 |  |  |  |  |  |  |
| Yes | **2.90** | **1.73** | **4.85** |  | **11.71** | **5.81** | **23.59** |
| Psychological disease | None |  |  |  |  |  |  |  |
| Yes | **2.23** | **1.09** | **4.55** |  | 0.97 | 0.25 | 3.71 |
| Quality of interview (Continous) | Quality score | 0.90 | 0.76 | 1.06 |  | 0.99 | 0.73 | 1.33 |
|  |  |  |  |  |  |  |  |  |

# Supplementary table S5.1:

We present the p value of the LRT of the comparison between the null model (exposure= sex + age + country) and the model where the covariate was added (exposure= COVARIATE + sex + age + country)

| *Null model: exposure= sex + age + country* | **p of LRT**  **(in the whole study sample)** | **p of LRT**  **(only in controls)** |
| --- | --- | --- |
| **Covariate tested** |  |  |
| + Parental education | 0.6102 | 0.6789 |
| + Neurological disease | **< 0.001** | **< 0.001** |
| +Pyschological disease | **0.0361** | 0.1059 |
| + Genetic disease | 0.1153 | 0.1518 |
| + Congenital disease | 0.1583 | NA |
| + Interviewee | 0.2253 | 0.6667 |
| + Interview quality | **0.0431** | 0.2264 |
